# Supplementary material for: Influence of Breast Cancer Extracellular Vesicles on Immune Cell Activation: A Pilot Study
Source: MDPI journal article supplement (doi:10.3390/biology12121531), 2023-12-15
Supplement: s1 [file s1]

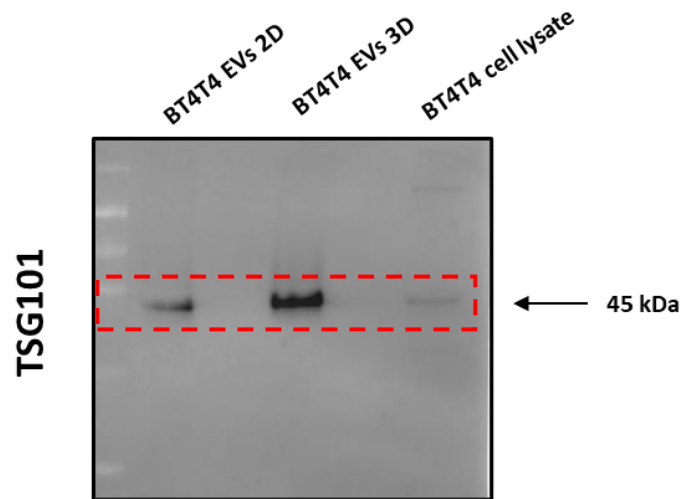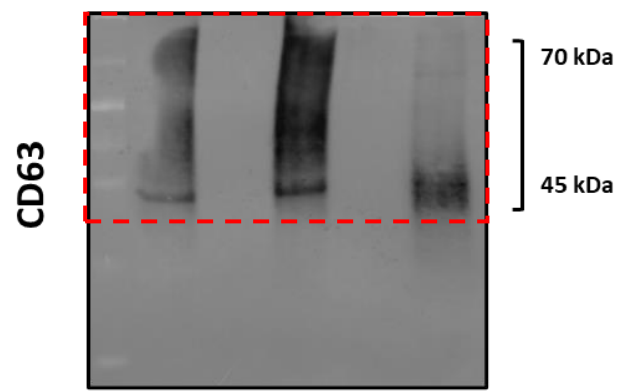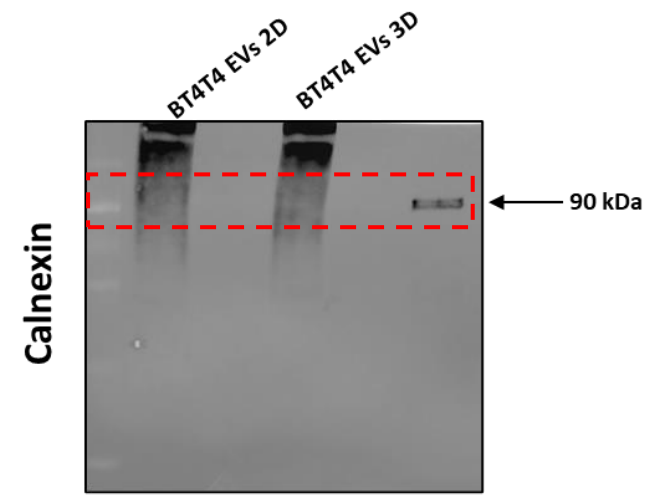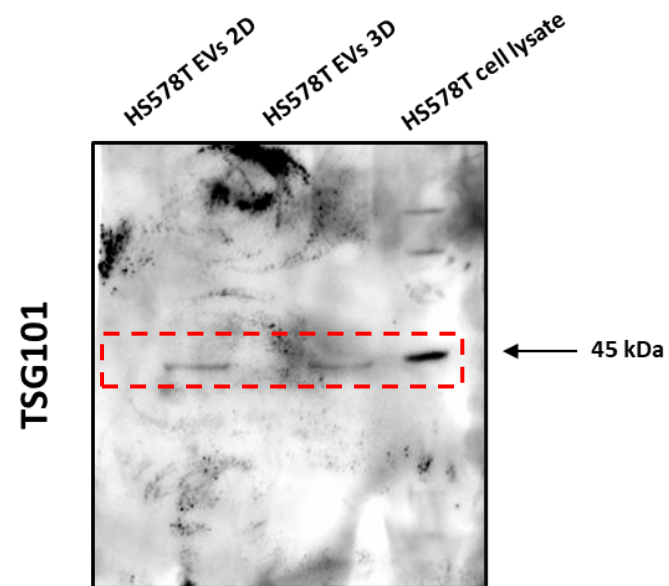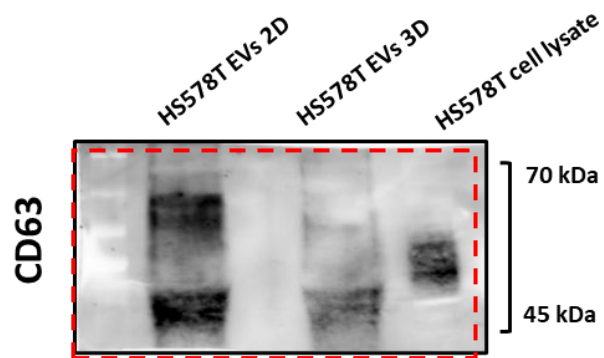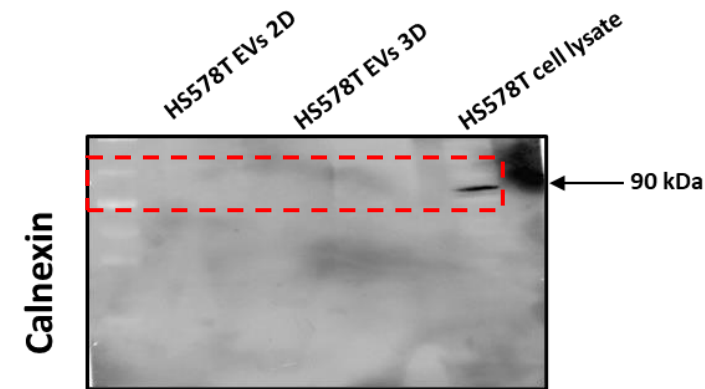

**Supplementary Figure S1. Uncropped WB images reported in Figure1. Red boxes report the cropped WB inserted in Figure1.**

**HS578T 10k cells spheroid**

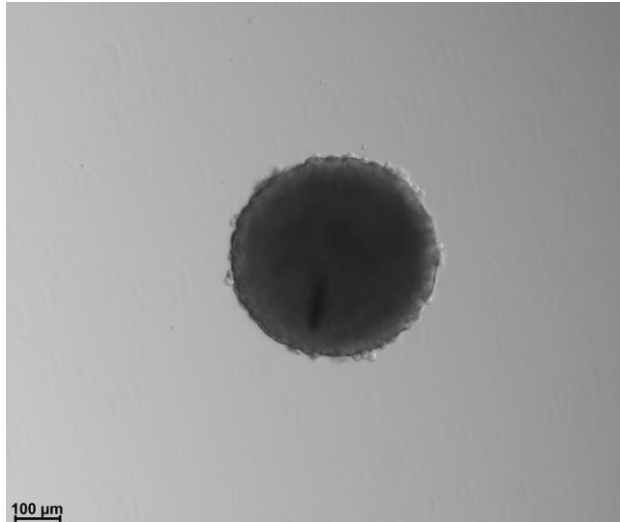

**BT474 10k cells spheroid**

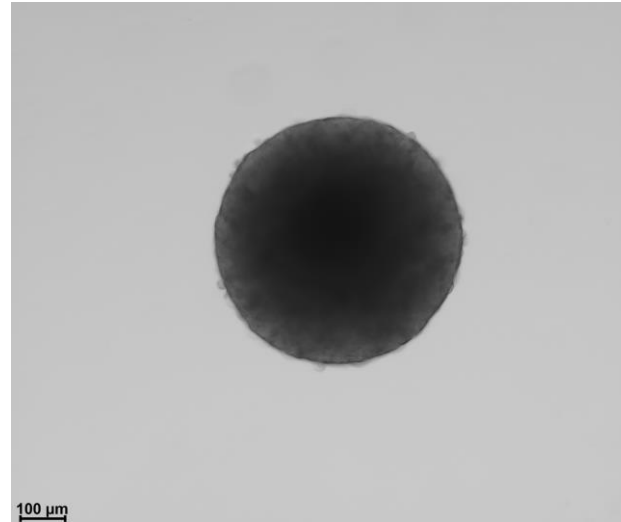

|                        | Size     |
|------------------------|----------|
| <b>HS578T spheroid</b> | 460.2 μm |
| <b>BT474 spheroid</b>  | 588.8 μm |

**Supplementary Figure S2. Spheroids characterization.** Representative confocal images of BT474 and HS578T spheroids and size (bottom table).

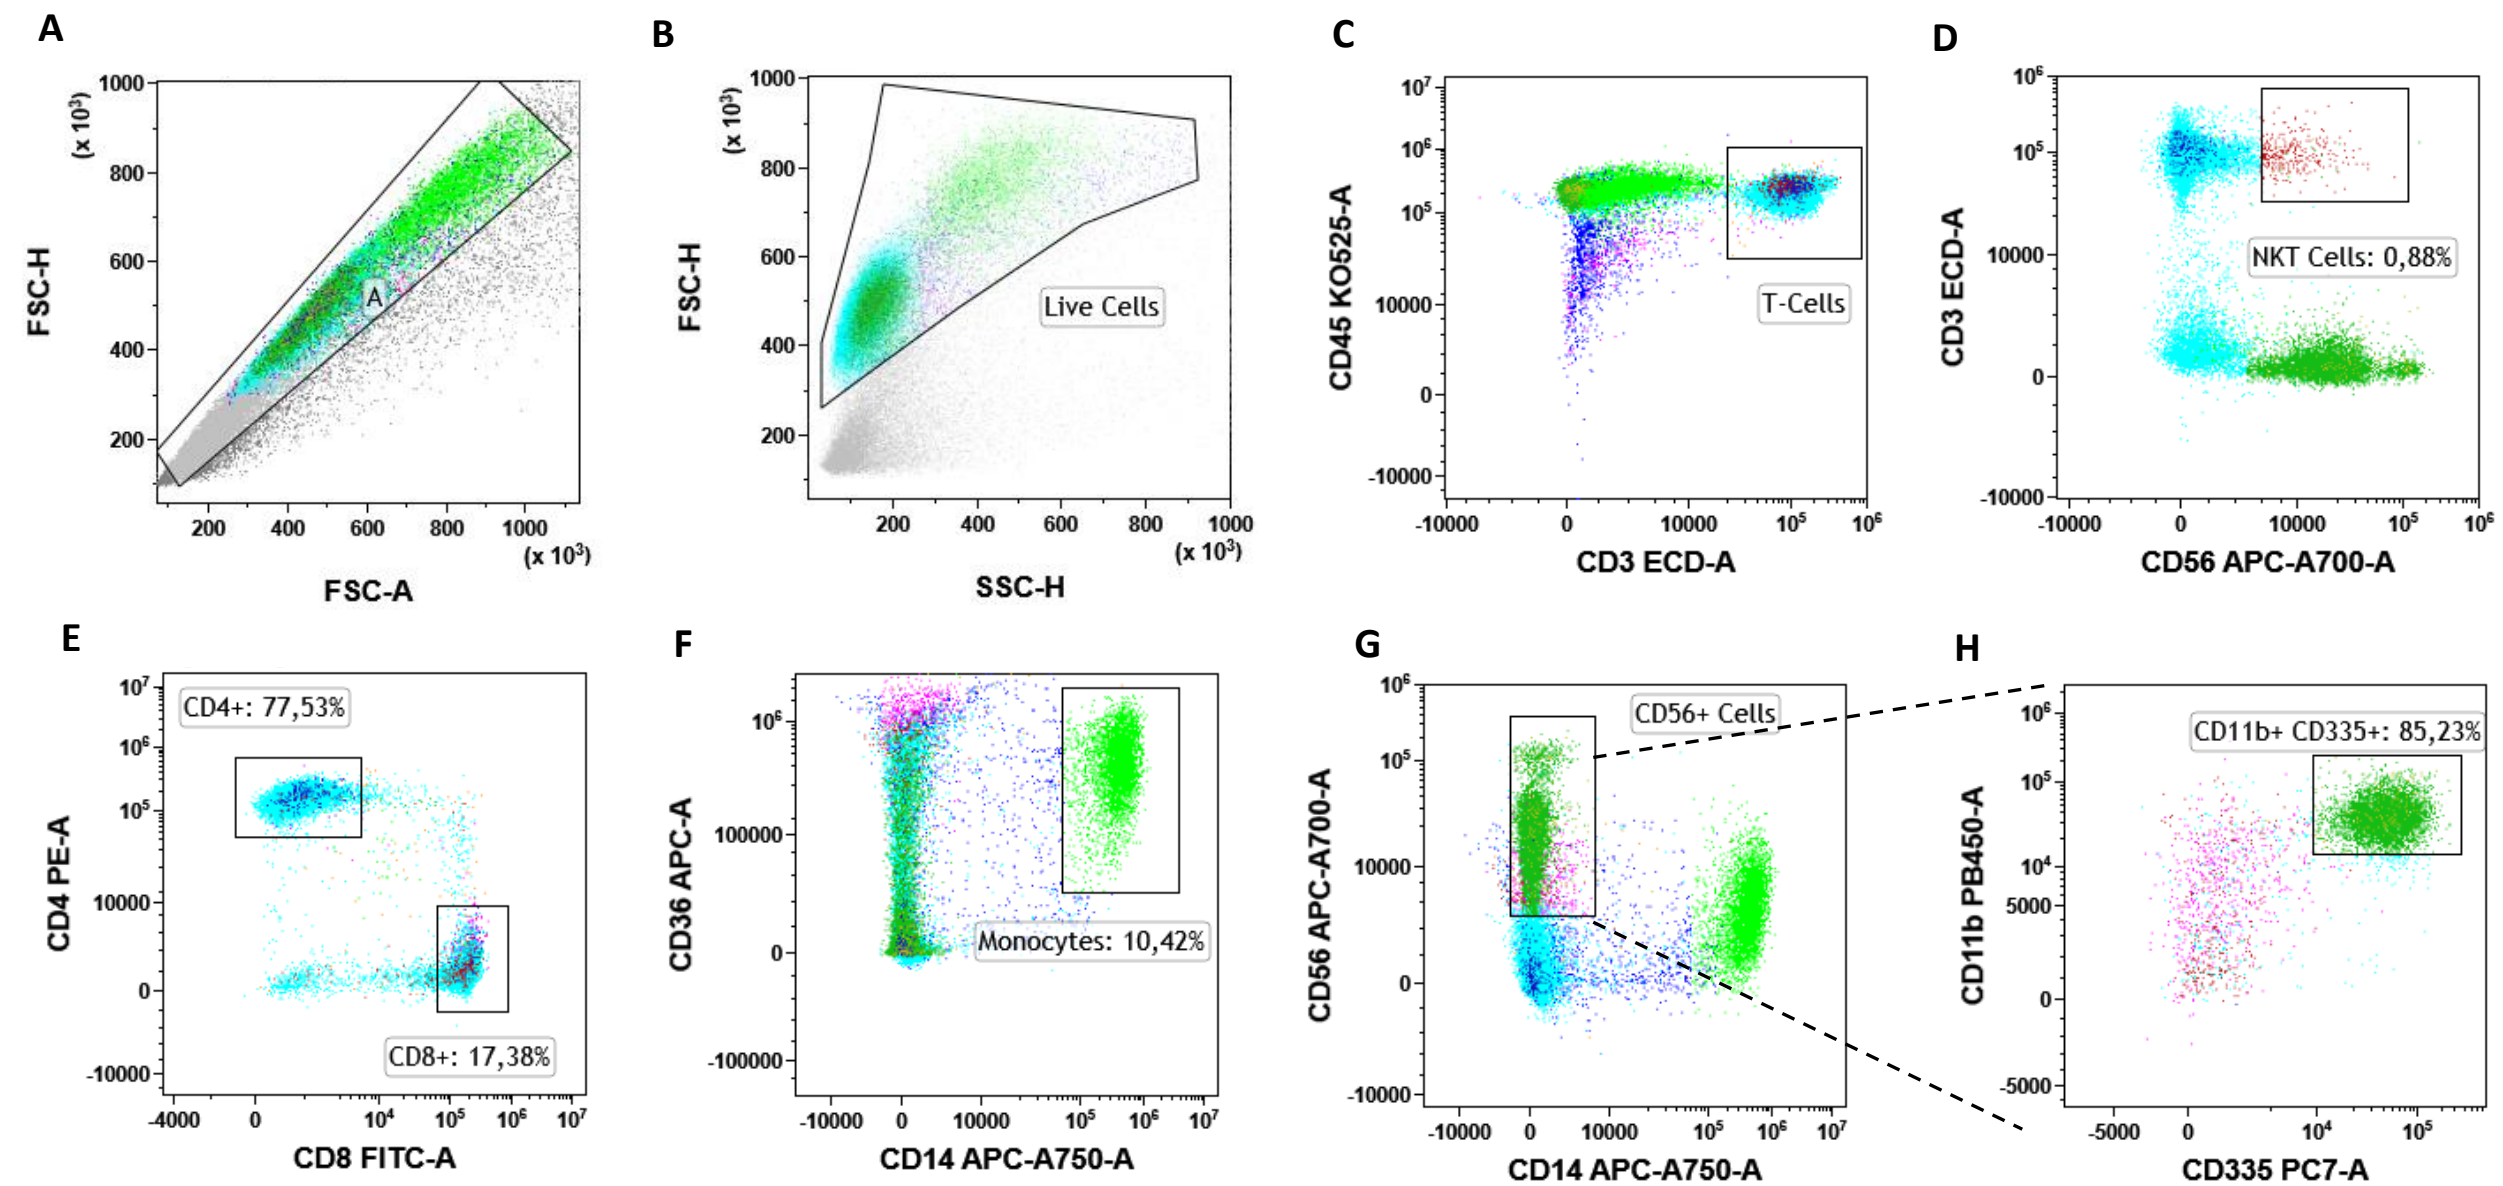

**Supplementary Figure S3. Gating strategy of gated cells reported in Figure 2-3-4-5.** Live cells (B) were gated using CD45<sup>+</sup>/CD3<sup>+</sup> cells to detect T-cells (C). CD3<sup>+</sup>/CD56<sup>+</sup> were selected as NKT Cells (D). Inside the T-Cells were separated CD4<sup>+</sup> and CD8<sup>+</sup> cells (E). From Live cells were identified the monocytes as CD14<sup>+</sup> cells (F). From live cells, the NK cells were selected as CD56<sup>+</sup> cells (G). Inside the CD56<sup>+</sup>, the CD11b<sup>+</sup>/CD335<sup>+</sup> cells were selected (H).

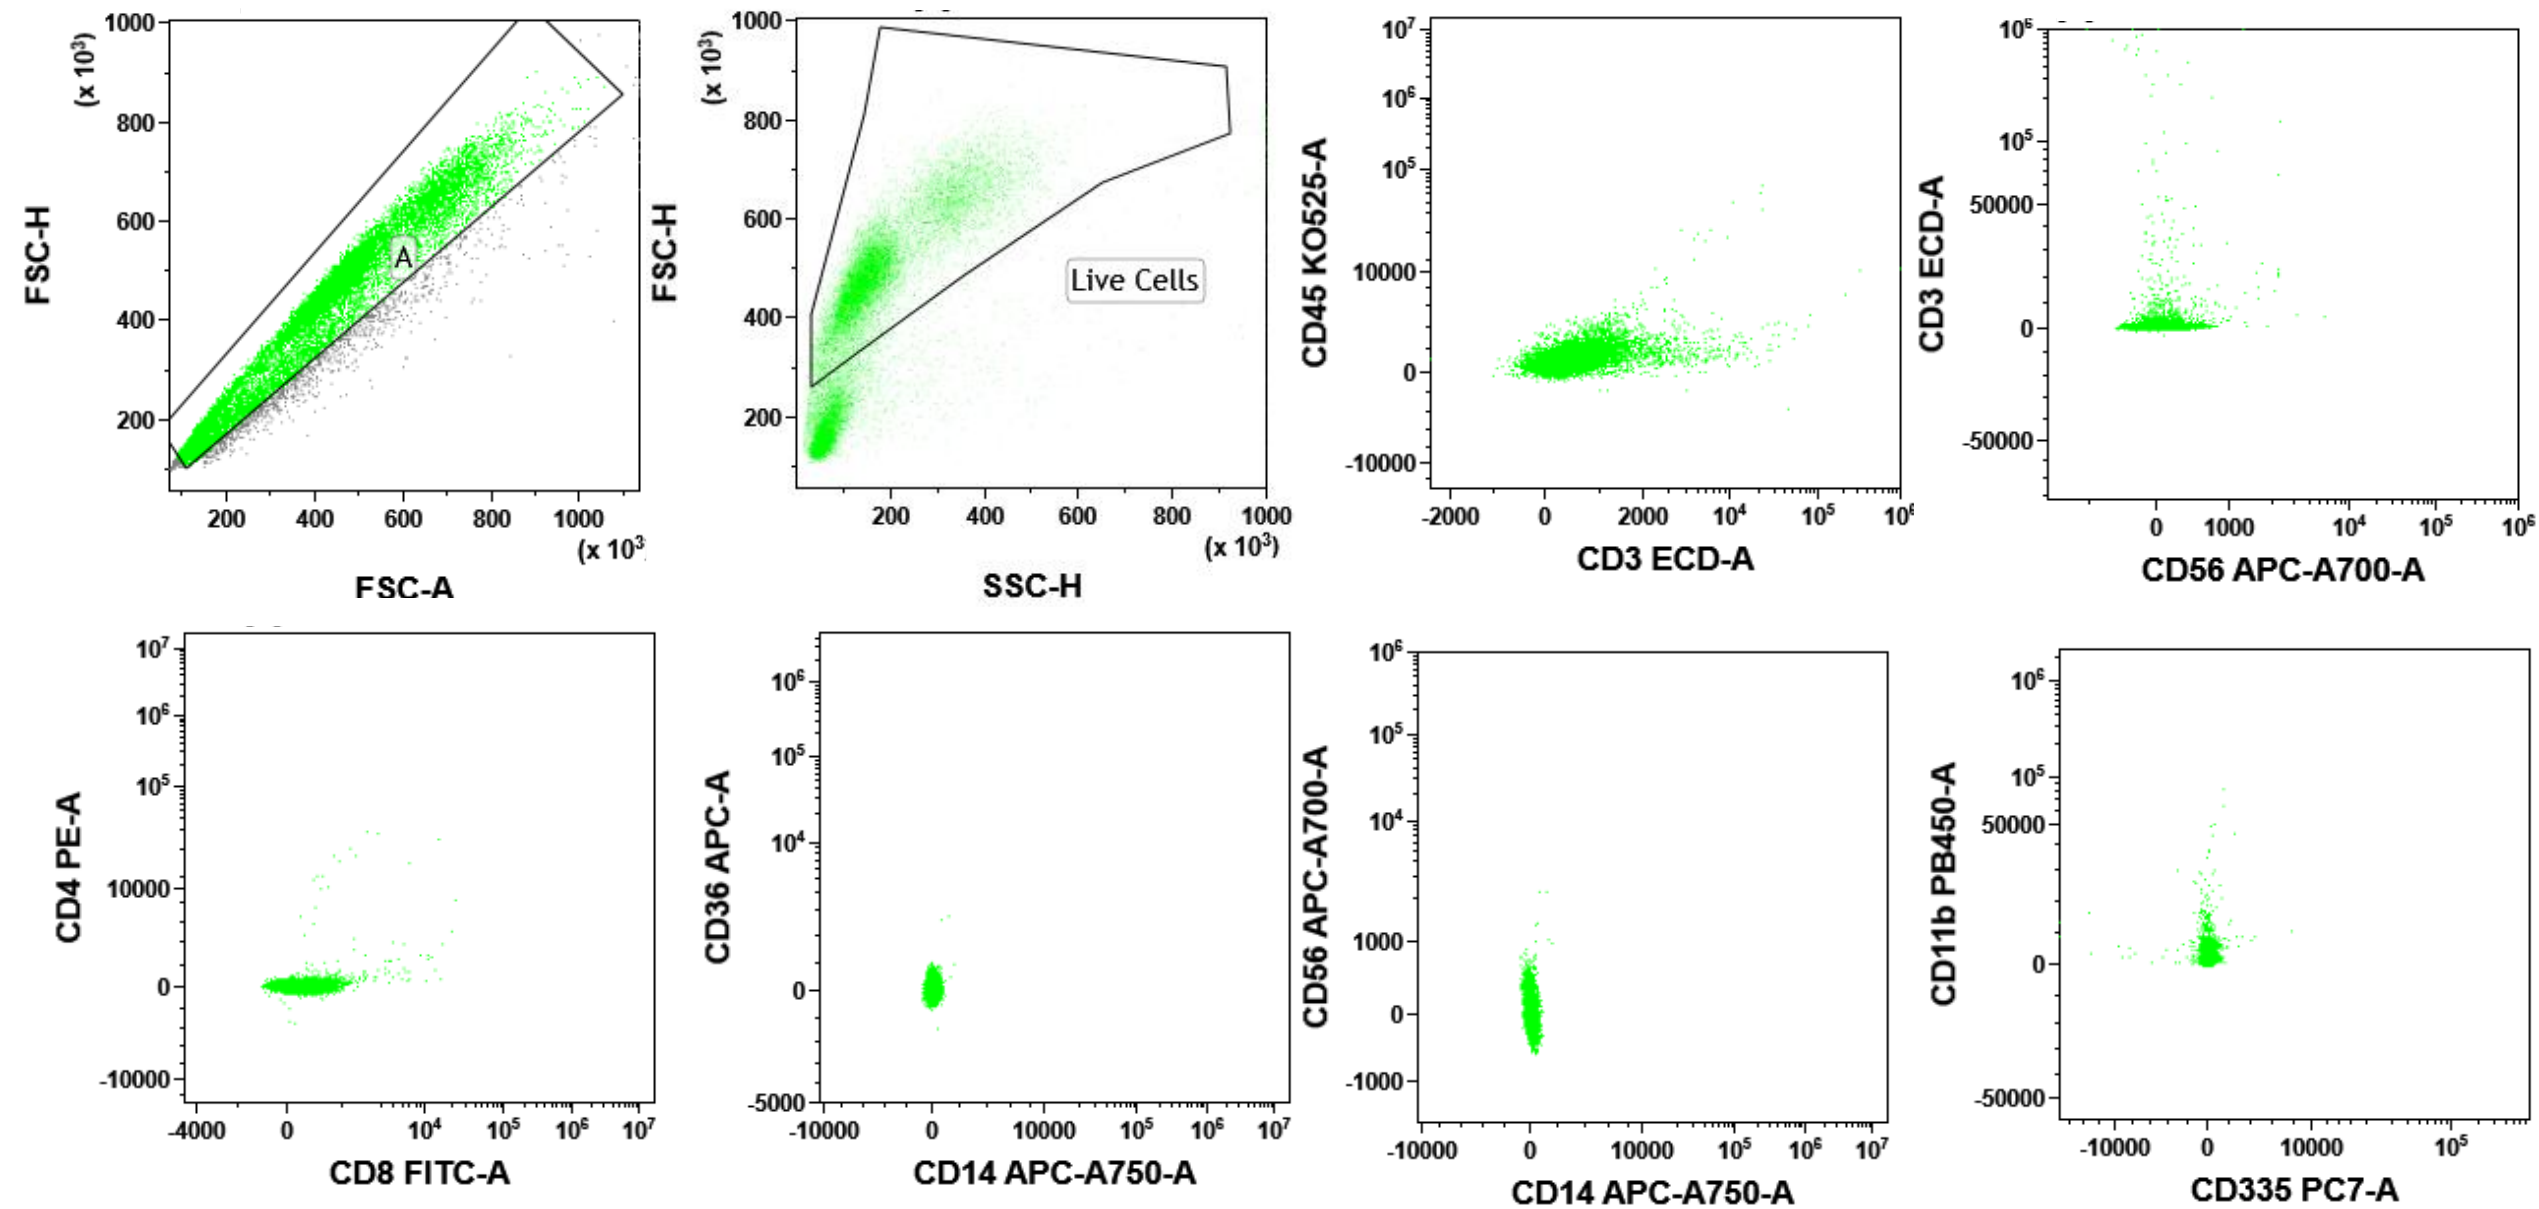

**Supplementary Figure S4.** Negative control of analyzed PBMCs.

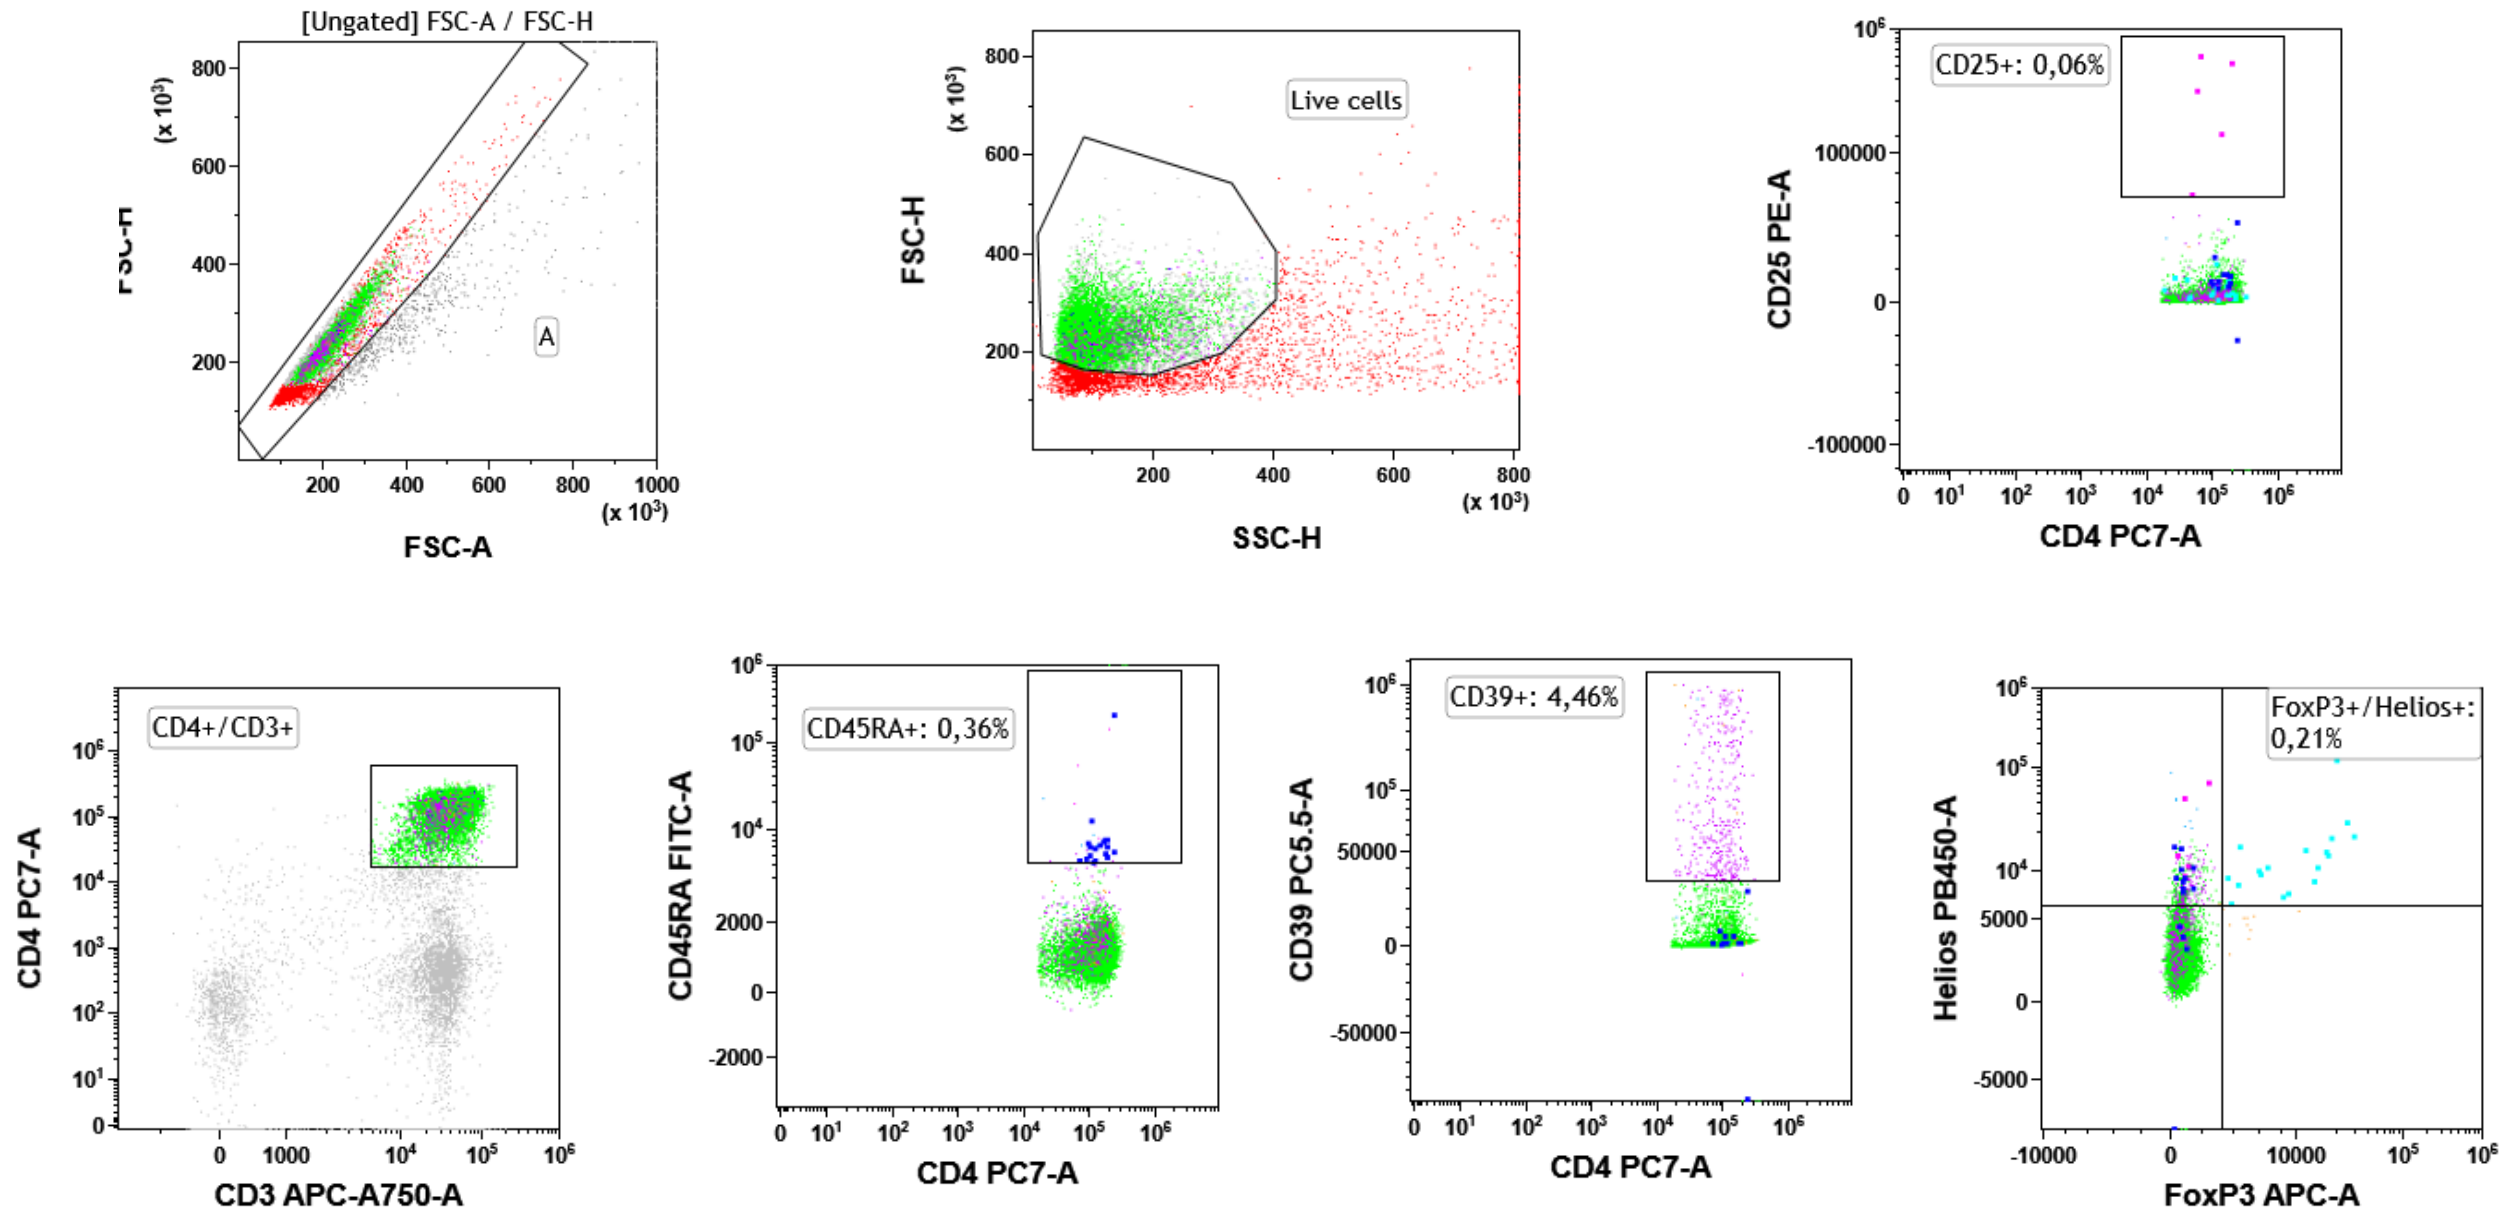

**Supplementary Figure S5.** Gating strategy of T-reg Cells identified in Figure 6.
